# Supplementary material
Source: bioRxiv or medRxiv preprint supplement (https://medrxiv.org/highwire/filestream/84467/field_highwire_adjunct_files/0/2020.06.01.20119750-1.pdf)

## Supplementary Information

### **SARS-CoV-2 genomic and subgenomic RNAs in diagnostic samples are not an indicator of active replication**

Soren Alexandersen<sup>1,2,3,\*</sup>, Anthony Chamings<sup>1,2</sup>, and Tarka Raj Bhatta<sup>1,2</sup>

<sup>1</sup>Geelong Centre for Emerging Infectious Diseases, Geelong, VIC 3220, Australia; <sup>2</sup>Deakin University, Geelong, VIC 3220, Australia; <sup>3</sup>Barwon Health, University Hospital Geelong, Geelong, VIC 3220 Australia

\* Correspondence: soren.alexandersen@deakin.edu.au; Tel.: +61-0-342159635

Supplementary Information S1. Fasta file (Wuhan-Hu-1-NC\_045512-21500-and-subgenomics-SA4.fasta) with the sequences used to map genome and subgenomic RNAs.

>First\_21500\_nt

```
ATTAAAGGTTTATACCTTCCCAGGTAACAAACCAACCAACTTTCGATCTCTTGTA
GATCTGTTCTCTAAACGAACTTTAAAATCTGTGTGGCTGTCACTCGGCTGCATGC
TTAGTGCACCTCACGCAGTATAATTAATAACTAATTACTGTCGTTGACAGGACACG
AGTAACTCGTCTATCTTCTGCAGGCTGCTTACGGTTTCGTCCGTGTTGCAGCCGAT
CATCAGCACATCTAGGTTTCGTCCGGGTGTGACCGAAAGGTAAGATGGAGAGCC
TTGTCCCTGGTTTCAACGAGAAAACACACGTCCAACCTCAGTTTGCCTGTTTTACA
GGTTCGCGACGTGCTCGTACGTGGCTTTGGAGACTCCGTGGAGGAGGTCTTATCA
GAGGCACGTCAACATCTTAAAGATGGCACTTGTGGCTTAGTAGAAGTTGAAAAA
GGCGTTTTGCCTCAACTTGAACAGCCCTATGTGTTTCATCAAACGTTCCGGATGCTC
GAACTGCACCTCATGGTCATGTTATGGTTGAGCTGGTAGCAGAACTCGAAGGCAT
TCAGTACGGTCGTAGTGGTGAGACACTTGGTGTCCCTCATGTGGGCGAA
ATACCAGTGGCTTACCGCAAGGTTCTTCTTCGTAAGAACGGTAATAAAGGAGCTG
GTGGCCATAGTTACGGCGCCGATCTAAAGTCATTTGACTTAGGCGACGAGCTTGG
CACTGATCCTTATGAAGATTTTCAAGAAAACCTGGAACACTAAACATAGCAGTGG
```

TGTTACCCGTGAACTCATGCGTGAGCTTAACGGAGGGGCATACACTCGCTATGTC  
GATAACAACCTTCTGTGGCCCTGATGGCTACCCTCTTGAGTGCATTAAAGACCTTC  
TAGCACGTGCTGGTAAAGCTTCATGCACTTTGTCCGAACAACCTGGACTTTATTGA  
CACTAAGAGGGGTGTATACTGCTGCCGTGAACATGAGCATGAAATTGCTTGGTA  
CACGGAACGTTCTGAAAAGAGCTATGAATTGCAGACACCTTTTGAAATTAATTG  
GCAAAGAAATTTGACACCTTCAATGGGGAATGTCCAAATTTTGTATTTCCCTTAA  
ATTCCATAATCAAGACTATTCAACCAAGGGTTGAAAAGAAAAAGCTTGATGGCT  
TTATGGGTAGAATTCGATCTGTCTATCCAGTTGCGTCACCAAATGAATGCAACCA  
AATGTGCCTTCAACTCTCATGAAGTGTGATCATTGTGGTGAACTTCATGGCAG  
ACGGGCGATTTTGTAAAGCCACTTGCGAATTTTGTGGCACTGAGAATTTGACTA  
AAGAAGGTGCCACTACTTGTGGTACTTACCCCAAATGCTGTTGTTAAAATTTA  
TTGTCCAGCATGTCACAATTCAGAAGTAGGACCTGAGCATAGTCTTGCCGAATAC  
CATAATGAATCTGGCTTGAAAACCATTCTTCGTAAGGGTGGTCGCACTATTGCCT  
TTGGAGGCTGTGTGTTCTCTTATGTTGGTTGCCATAACAAGTGTGCCTATTGGGTT  
CCACGTGCTAGCGCTAACATAGGTTGTAACCATACAGGTGTTGTTGGAGAAGGTT  
CCGAAGGTCTTAATGACAACCTTCTTGAAATACTCCAAAAAGAGAAAGTCAACA  
TCAATATTGTTGGTGACTTTAACTTAATGAAGAGATCGCCATTATTTTGGCATCT  
TTTTCTGCTTCCACAAGTGCTTTTGTGGAACTGTGAAAGGTTTGGATTATAAAG  
CATTCAAACAAATTGTTGAATCCTGTGGTAATTTTAAAGTTACAAAAGGAAAAGC  
TAAAAAAGGTGCCTGGAATATTGGTGAACAGAAATCAATACTGAGTCCTCTTTAT  
GCATTTGCATCAGAGGCTGCTCGTGTGTACGATCAATTTTCTCCCGCACTCTTGA  
AACTGCTCAAATTTCTGTGCGTGTTTTACAGAAGGCCGCTATAACAATACTAGAT  
GGAATTTACAGTATTCACTGAGACTCATTGATGCTATGATGTTACATCTGATTT  
GGCTACTAACAATCTAGTTGTAATGGCCTACATTACAGGTGGTGTGTTTTCAGTTG  
ACTTCGCAGTGGCTAACTAACATCTTTGGCACTGTTTATGAAAACTCAAACCCG  
TCCTTGATTGGCTTGAAGAGAAGTTTAAAGGAAGGTGTAGAGTTTCTTAGAGACGG  
TTGGGAAATTGTTAAATTTATCTCAACCTGTGCTTGTGAAATTGTTCGGTGGACAA  
ATTGTCACCTGTGCAAAGGAAATTAAGGAGAGTGTTCAGACATTCTTTAAGCTTG  
TAAATAAATTTTGGCTTTGTGTGCTGACTCTATCATTATTGGTGGAGCTAACTT  
AAAGCCTTGAATTTAGGTGAAACATTTGTCACGCACTCAAAGGGATTGTACAGA  
AAGTGTGTTAAATCCAGAGAAGAACTGGCCTACTCATGCCTCTAAAAGCCCCA  
AAAGAAATTATCTTCTTAGAGGGAGAAACACTTCCCACAGAAGTGTTAACAGAG  
GAAGTTGTCTTGAAAACCTGGTGATTTACAACCATTAGAACAACCTACTAGTGAAG  
CTGTTGAAGCTCCATTGGTTGGTACACCAGTTTGTATTAACGGGCTTATGTTGCTC

GAAATCAAAGACACAGAAAAGTACTGTGCCCTTGCACCTAATATGATGGTAACA  
ACAATACCTTCACACTCAAAGGCGGTGCACCAACAAAGGTTACTTTTGGTGATG  
ACACTGTGATAGAAGTGCAAGGTTACAAGAGTGTGAATATCACTTTTGAACCTGA  
TGAAAGGATTGATAAAGTACTTAATGAGAAGTGCTCTGCCTATACAGTTGAACTC  
GGTACAGAAGTAAATGAGTTCGCCTGTGTTGTGGCAGATGCTGTCATAAAAACCT  
TGCAACCAGTATCTGAATTACTTACACCACTGGGCATTGATTTAGATGAGTGGAG  
TATGGCTACATACTACTTATTTGATGAGTCTGGTGAGTTTAAATTGGCTTCACATA  
TGTATTGTTCTTTCTACCCTCCAGATGAGGATGAAGAAGAAGGTGATTGTGAAGA  
AGAAGAGTTTGAGCCATCAACTCAATATGAGTATGGTACTGAAGATGATTACCA  
AGGTAAACCTTTGGAATTTGGTGCCACTTCTGCTGCTCTTCAACCTGAAGAAGAG  
CAAGAAGAAGATTGGTTAGATGATGATAGTCAACAACTGTTGGTCAACAAGAC  
GGCAGTGAGGACAATCAGACAACACTACTATTCAAACAATTGTTGAGGTTCAACCT  
CAATTAGAGATGGAACCTTACACCAGTTGTTTCAGACTATTGAAGTGAATAGTTTTA  
GTGGTTATTTAAAACCTACTGACAATGTATACATTA AAAAATGCAGACATTGTGGA  
AGAAGCTAAAAAGGTAAAACCAACAGTGGTTGTTAATGCAGCCAATGTTTACCT  
TAAACATGGAGGAGGTGTTGCAGGAGCCTTAAATAAGGCTACTAACAAATGCCAT  
GCAAGTTGAATCTGATGATTACATAGCTACTAATGGACCACTTAAAGTGGGTGGT  
AGTTGTGTTTTAAGCGGACACAATCTTGCTAAACACTGTCTTCATGTTGTCGGCC  
CAAATGTTAACAAAGGTGAAGACATTCAACTTCTTAAGAGTGCTTATGAAAATTT  
TAATCAGCACGAAGTTCTACTTGCACCATTATTATCAGCTGGTATTTTTGGTGCTG  
ACCCTATACATTCTTTAAGAGTTTGTGTAGATACTGTTTCGCACAAATGTCTACTTA  
GCTGTCTTTGATAAAAATCTCTATGACAACTTGTTTCAAGCTTTTTGGAAATGA  
AGAGTGAAAAGCAAGTTGAACAAAAGATCGCTGAGATTCCCTAAAGAGGAAGTTA  
AGCCATTTATAACTGAAAGTAAACCTTCAGTTGAACAGAGAAAACAAGATGATA  
AGAAAATCAAAGCTTGTGTTGAAGAAGTTACAACAACCTCTGGAAGAACTAAGT  
TCCTCACAGAAAACCTTGTTACTTTATATTGACATTAATGGCAATCTTCATCCAGAT  
TCTGCCACTCTTGTTAGTGACATTGACATCACTTTCTTAAAGAAAGATGCTCCAT  
ATATAGTGGGTGATGTTGTTCAAGAGGGTGTTTTAACTGCTGTGGTTATACCTAC  
TAAAAGGCTGGTGGCACTACTGAAATGCTAGCGAAAGCTTTGAGAAAAGTGCC  
AACAGACAATTATATAACCACTTACCCGGGTCAGGGTTTAAATGGTTACACTGTA  
GAGGAGGCAAAGACAGTGCTTAAAAAGTGTA AAAAGTGCCTTTTACATTCTACCA  
TCTATTATCTCTAATGAGAAGCAAGAAATTCTTGGAACCTGTTTCTTGGAATTTGC  
GAGAAATGCTTGCACATGCAGAAGAAACACGCAAATTAATGCCTGTCTGTGTGG  
AAACTAAAGCCATAGTTTCAACTATACAGCGTAAATATAAGGGTATTA AAAATAC

AAGAGGGTGTGGTTGATTATGGTGCTAGATTTTACTTTTACACCAGTAAAACAAC  
TGTAGCGTCACTTATCAACACACTTAACGATCTAAATGAAACTCTTGTTACAATG  
CCACTTGGCTATGTAACACATGGCTTAAATTTGGAAGAAGCTGCTCGGTATATGA  
GATCTCTCAAAGTGCCAGCTACAGTTTCTGTTTCTTCACCTGATGCTGTTACAGCG  
TATAATGGTTATCTTACTTCTTCTTCTAAAACACCTGAAGAACATTTTATTGAAAC  
CATCTCACTTGCTGGTTCCTATAAAGATTGGTCCTATTCTGGACAATCTACACAA  
CTAGGTATAGAATTTCTTAAGAGAGGTGATAAAAGTGTATATTACACTAGTAATC  
CTACCACATTCACCTAGATGGTGAAGTTATCACCTTTGACAATCTTAAGACACT  
TCTTTCTTTGAGAGAAGTGAGGACTATTAAGGTGTTTACAACAGTAGACAACATT  
AACCTCCACACGCAAGTTGTGGACATGTCAATGACATATGGACAACAGTTTGGTC  
CAACTTATTTGGATGGAGCTGATGTTACTAAAATAAAACCTCATAATTCACATGA  
AGGTA AACATTTTATGTTTTACCTAATGATGACACTCTACGTGTTGAGGCTTTTG  
AGTACTACCACACA ACTGATCCTAGTTTTCTGGGTAGGTACATGTCAGCATTAAA  
TCACACTAAAAGTGGAAATACCCACAAGTTAATGGTTTAACTTCTATTAAATGG  
GCAGATAACA ACTGTTATCTTGCCACTGCATTGTTAACACTCCAACAAATAGAGT  
TGAAGTTTAAATCCACCTGCTCTACAAGATGCTTATTACAGAGCAAGGGCTGGTGA  
AGCTGCTAACTTTTGTGCACTTATCTTAGCCTACTGTAATAAGACAGTAGGTGAG  
TTAGGTGATGTTAGAGAAACAATGAGT TACTTGTTTCAACATGCCAATTTAGATT  
CTTGCAAAAGAGTCTTGAACGTGGTGTGTA AA ACTTGTGGACAACAGCAGACAA  
CCCTTAAGGGTGTAGAAAGCTGTTATGTACATGGGCACACTTTCTTATGAACAATT  
TAAGAAAGGTGTT CAGATACCTTGTACGTGTGGTAAACAAGCTACAAAATATCT  
AGTACAACAGGAGTCACCTTTTGT TATGATGTCAGCACCACCTGCTCAGTATGAA  
CTTAAGCATGGTACATTTACTTGTGCTAGTGAGTACACTGGTAATTACCAGTGTG  
GTCACTATAAACATATAACTTCTAAAGAACTTTGTATTGCATAGACGGTGCTTT  
ACTTACAAAGTCCTCAGAATACAAAGGTCCTATTACGGATGTTTTCTACAAAGAA  
AACAGTTACACAACAACCATAAAACCAGT TACTTATAAATTGGATGGTGTGTTT  
GTACAGAAATTGACCCTAAGTTGGACAATTATTATAAGAAAGACAATTCTTATTT  
CACAGAGCAACCAATTGATCTTGTACCAAACCAACCATATCCAAACGCAAGCTT  
CGATAATTTAAGTTTGTATGTGATAATATCAAATTTGCTGATGATTTAAACCAG  
TAACTGGTTATAAGAAACCTGCTTCAAGAGAGCTTAAAGTTACATTTTCCCTG  
ACTTAAATGGTGATGTGGTGGCTATTGATTATAAACACTACACACCCTCTTTTAA  
GAAAGGAGCTAAATTGTTACATAAACCTATTGTTTGGCATGTTAACAATGCAACT  
AATAAAGCCACGTATAAACCAAATACCTGGTGTATACGTTGTCTTTGGAGCACAA  
AACAGTTGAAACATCAAATTCGTTTGATGTACTGAAGTCAGAGGACGCGCAGG

GAATGGATAATCTTGCCTGCGAAGATCTAAAACCAGTCTCTGAAGAAGTAGTGG  
AAAATCCTACCATACAGAAAGACGTTCTTGAGTGTAATGTGAAAACCTACCGAAG  
TTGTAGGAGACATTATACTTAAACCAGCAAATAATAGTTTAAAAATTACAGAAG  
AGGTTGGCCACACAGATCTAATGGCTGCTTATGTAGACAATTCTAGTCTTACTAT  
TAAGAAACCTAATGAATTATCTAGAGTATTAGGTTTGAAAACCCTTGCTACTCAT  
GGTTTAGCTGCTGTTAATAGTGTCCCTTGGGATACTATAGCTAATTATGCTAAGC  
CTTTTCTTAACAAAGTTGTTAGTACAACCTACTAACATAGTTACACGGTGTTTAAA  
CCGTGTTTGTACTAATTATATGCCTTATTTCTTTACTTTATTGCTACAATTGTGTAC  
TTTTACTAGAAGTACAAATTCTAGAATTAAGCATCTATGCCGACTACTATAGCA  
AAGAATACTGTTAAGAGTGTCCGGTAAATTTTGTCTAGAGGCTTCATTTAATTATT  
TGAAGTCACCTAATTTTTCTAAACTGATAAATATTATAATTTGGTTTTTACTATTA  
AGTGTTTGCCTAGGTTCTTTAATCTACTCAACCGCTGCTTTAGGTGTTTTAATGTC  
TAATTTAGGCATGCCTTCTTACTGTACTGGTTACAGAGAAGGCTATTTGAACTCT  
ACTAATGTCACTATTGCAACCTACTGTACTGGTTCTATACCTTGTAGTGTTTGTCT  
TAGTGGTTTAGATTCTTTAGACACCTATCCTTCTTTAGAACTATACAAATTACCA  
TTTCATCTTTTAAATGGGATTTAACTGCTTTTGGCTTAGTTGCAGAGTGGTTTTTG  
GCATATATTCTTTTCACTAGGTTTTTCTATGTACTTGGATTGGCTGCAATCATGCA  
ATTGTTTTTCAGCTATTTTGCAGTACATTTTATTAGTAATTCTTGGCTTATGTGGTT  
AATAATTAATCTTGTACAAATGGCCCCGATTTTCAGCTATGGTTAGAATGTACATC  
TTCTTTGCATCATTTTATTATGTATGGAAAAGTTATGTGCATGTTGTAGACGGTTG  
TAATTCATCAACTTGTATGATGTGTTACAAACGTAATAGAGCAACAAGAGTCGA  
ATGTACAACCTATTGTTAATGGTGTTAGAAGGTCCTTTTATGTCTATGCTAATGGA  
GGTAAAGGCTTTTGCAACTACACAATTGGAATTGTGTTAATTGTGATACATTCT  
GTGCTGGTAGTACATTTATTAGTGATGAAGTTGCGAGAGACTTGTCACTACAGTT  
TAAAAGACCAATAAATCCTACTGACCAGTCTTCTTACATCGTTGATAGTGTTACA  
GTGAAGAATGGTTCCATCCATCTTTACTTTGATAAAGCTGGTCAAAGACTTATG  
AAAGACATTCTCTCTCTCATTTTGTAACTTAGACAACCTGAGAGCTAATAACAC  
TAAAGGTTCAATTGCCTATTAATGTTATAGTTTTTGGATGGTAAATCAAATGTGAA  
GAATCATCTGCAAATCAGCGTCTGTTTACTACAGTCAGCTTATGTGTCAACCTA  
TACTGTTACTAGATCAGGCATTAGTGTCTGATGTTGGTGATAGTGCGGAAGTTGC  
AGTTAAAATGTTTGTGCTTACGTTAATACGTTTTTCATCAACTTTTAAACGTACCAA  
TGGA AAAACTCAAACACTAGTTGCAACTGCAGAAGCTGAACTTGCAAAGAATG  
TGTCCTTAGACAATGTCTTATCTACTTTTATTTTCAGCAGCTCGGCAAGGGTTTTGTT  
GATTCAGATGTAGAAACTAAAGATGTTGTTGAATGTCTTAAATTGTCACATCAAT

CTGACATAGAAGTTACTGGCGATAGTTGTAATAACTATATGCTCACCTATAACAA  
AGTTGAAAACATGACACCCCGTGACCTTGGTGCTTGTATTGACTGTAGTGCGCGT  
CATATTAATGCGCAGGTAGCAAAAAGTCACAACATTGCTTTGATATGGAACGTTA  
AAGATTTTCATGTCATTGTCTGAACAACACTACGAAAACAATACGTAGTGCTGCTAA  
AAAGAATAACTTACCTTTTAAGTTGACATGTGCAACTACTAGACAAGTTGTTAAT  
GTTGTAACAACAAAGATAGCACTTAAGGGTGGTAAAATTGTTAATAATTGGTTG  
AAGCAGTTAATTAAGTTACACTTGTGTTCCCTTTTTGTTGCTGCTATTTTCTATTT  
AATAACACCTGTTTCATGTCATGTCTAAACATACTGACTTTTCAAGTGAAATCATA  
GGATAACAAGGCTATTGATGGTGGTGTCACTCGTGACATAGCATCTACAGATACTT  
GTTTTGCTAACAAACATGCTGATTTTGACACATGGTTTAGCCAGCGTGGTGGTAG  
TTATACTAATGACAAAGCTTGCCCATTTGATTGCTGCAGTCATAACAAGAGAAGTG  
GGTTTTGTCGTGCCTGGTTTTGCCTGGCACGATATTACGCACAATAATGGTGACT  
TTTTGCATTTCTTACCTAGAGTTTTTAGTGCAGTTGGTAACATCTGTTACACACCA  
TCAAACCTTATAGAGTACACTGACTTTGCAACATCAGCTTGTGTTTTGGCTGCTG  
AATGTACAATTTTTAAAGATGCTTCTGGTAAGCCAGTACCATATTGTTATGATAC  
CAATGTACTAGAAGGTTCTGTTGCTTATGAAAGTTTACGCCCTGACACACGTTAT  
GTGCTCATGGATGGCTCTATTATTCAATTTCTAACACCTACCTTGAAGGTTCTGT  
TAGAGTGGTAACAACCTTTTGATTCTGAGTACTGTAGGCACGGCACTTGTGAAAGA  
TCAGAAGCTGGTGTGTTGTGTATCTACTAGTGGTAGATGGGTACTTAACAATGATT  
ATTACAGATCTTTACCAGGAGTTTTCTGTGGTGTAGATGCTGTAAATTTACTTACT  
AATATGTTTACACCACTAATTCAACCTATTGGTGCTTTGGACATATCAGCATCTAT  
AGTAGCTGGTGGTATTGTAGCTATCGTAGTAACATGCCTTGCCTACTATTTTATG  
AGGTTTAGAAGAGCTTTTTGGTGAATACAGTCATGTAGTTGCCTTTAATACTTTAC  
TATTCCTTATGTCATTCACTGTACTCTGTTTAAACACCAGTTTACTCATTCTTACCTG  
GTGTTTATTCTGTTATTTACTTGTACTTGACATTTTATCTTACTAATGATGTTTCTT  
TTTTAGCACATATTCAGTGGATGGTTATGTTACACCTTTAGTACCTTTCTGGATA  
ACAATTGCTTATATCATTTGTATTTCCACAAAGCATTCTATTGGTTCTTTAGTAA  
TTACCTAAAGAGACGTGTAGTCTTTAATGGTGTTTCCTTTAGTACTTTTGAAGAA  
GCTGCGCTGTGCACCTTTTTGTAAATAAAGAAATGTATCTAAAGTTGCGTAGTG  
ATGTGCTATTACCTCTTACGCAATATAATAGATACTTAGCTCTTTATAATAAGTAC  
AAGTATTTTAGTGGAGCAATGGATAACAACACTAGCTACAGAGAAGCTGCTTGTGTC  
ATCTCGCAAAGGCTCTCAATGACTTCAGTAACTCAGGTTCTGATGTTCTTTACCA  
ACCACCACAAACCTCTATCACCTCAGCTGTTTTGCAGAGTGGTTTTAGAAAAATG  
GCATTCCCATCTGGTAAAGTTGAGGGTTGTATGGTACAAGTAACTTGTGGTACAA

CTACACTTAACGGTCTTTGGCTTGATGACGTAGTTTACTGTCCAAGACATGTGAT  
CTGCACCTCTGAAGACATGCTTAACCCTAATTATGAAGATTTACTCATTTCGTAAG  
TCTAATCATAATTTCTTGGTACAGGCTGGTAATGTTCAACTCAGGGTTATTGGAC  
ATTCTATGCAAATTGTGTACTTAAGCTTAAGGTTGATACAGCCAATCCTAAGAC  
ACCTAAGTATAAGTTTGTTCGCATTCAACCAGGACAGACTTTTTTCAGTGTTAGCT  
TGTTACAATGGTTCACCATCTGGTGTTTACCAATGTGCTATGAGGCCCAATTTCA  
CTATTAAGGGTTCATTCCTTAATGGTTCATGTGGTAGTGTTGGTTTTAACATAGAT  
TATGACTGTGTCTCTTTTTGTTACATGCACCATATGGAATTACCAACTGGAGTTCA  
TGCTGGCACAGACTTAGAAGGTAACTTTTATGGACCTTTTGTTGACAGGCAAACA  
GCACAAGCAGCTGGTACGGACACAACCTATTACAGTTAATGTTTTAGCTTGGTTGT  
ACGCTGCTGTTATAAATGGAGACAGGTGGTTTCTCAATCGATTTACCACAACCTCT  
TAATGACTTTAACCTTGTGGCTATGAAGTACAATTATGAACCTCTAACACAAGAC  
CATGTTGACATACTAGGACCTCTTCTGCTCAAACCTGGAATTGCCGTTTTAGATAT  
GTGTGCTTCATTAAGAATTACTGCAAATGGTATGAATGGACGTACCATATTG  
GGTAGTGCTTTATTAGAAGATGAATTTACACCTTTTGATGTTGTTAGACAATGCT  
CAGGTGTTACTTTCCAAAGTGCAGTGAAAAGAACAATCAAGGGTACACACCACT  
GGTTGTTACTCACAATTTGACTTCACTTTTAGTTTTAGTCCAGAGTACTCAATGG  
TCTTTGTTCTTTTTTTGTATGAAAATGCCTTTTTACCTTTTGCTATGGGTATTATT  
GCTATGTCTGCTTTTGCAATGATGTTTGTCAAACATAAGCATGCATTTCTCTGTTT  
GTTTTGTTACCTTCTCTTGCCACTGTAGCTTATTTAATATGGTCTATATGCCTGC  
TAGTTGGGTGATGCGTATTATGACATGGTTGGATATGGTTGATACTAGTTTGTCT  
GGTTTTAAGCTAAAAGACTGTGTTATGTATGCATCAGCTGTAGTGTTACTAATCC  
TTATGACAGCAAGAACTGTGTATGATGATGGTGCTAGGAGAGTGTGGACACTTA  
TGAATGTCTTGACACTCGTTTATAAAGTTTATTATGGTAATGCTTTAGATCAAGCC  
ATTTCCATGTGGGCTCTTATAATCTCTGTTACTTCTAACTACTCAGGTGTAGTTAC  
AACTGTCATGTTTTTGCCAGAGGTATTGTTTTATGTGTGTTGAGTATTGCCCTA  
TTTTCTTCATAACTGGTAATACACTTCAGTGTATAATGCTAGTTTATTGTTTCTTA  
GGCTATTTTTGTACTTGTTACTTTGGCCTCTTTTGTTTACTCAACCGCTACTTTAGA  
CTGACTCTTGGTGTTTATGATTACTTAGTTTCTACACAGGAGTTTAGATATATGAA  
TTCACAGGGACTACTCCCACCAAGAATAGCATAGATGCCTTCAAACCTCAACATT  
AAATTGTTGGGTGTTGGTGGCAAACCTTGTATCAAAGTAGCCACTGTACAGTCTA  
AAATGTCAGATGTAAAGTGCACATCAGTAGTCTTACTCTCAGTTTTGCAACAACCT  
CAGAGTAGAATCATCATCTAAATTGTGGGCTCAATGTGTCCAGTTACACAATGAC  
ATTCTCTTAGCTAAAGATACTACTGAAGCCTTTGAAAAAATGGTTTCACTACTTT

CTGTTTTGCTTTCCATGCAGGGTGCTGTAGACATAAACAAGCTTTGTGAAGAAAT  
GCTGGACAACAGGGCAACCTTACAAGCTATAGCCTCAGAGTTTAGTTCCTTCCA  
TCATATGCAGCTTTTGCTACTGCTCAAGAAGCTTATGAGCAGGCTGTTGCTAATG  
GTGATTCTGAAGTTGTTCTTAAAAAGTTGAAGAAGTCTTTGAATGTGGCTAAATC  
TGAATTTGACCGTGATGCAGCCATGCAACGTAAGTTGGAAAAGATGGCTGATCA  
AGCTATGACCCAAATGTATAAACAGGCTAGATCTGAGGACAAGAGGGCAAAAGT  
TACTAGTGCTATGCAGACAATGCTTTTCACTATGCTTAGAAAGTTGGATAATGAT  
GCACTCAACAACATTATCAACAATGCAAGAGATGGTTGTGTTCCCTTGAACATAA  
TACCTCTTACAACAGCAGCCAACTAATGGTTGTCATACCAGACTATAACACATA  
TAAAAATACGTGTGATGGTACAACATTTACTTATGCATCAGCATTGTGGGAAATC  
CAACAGGTTGTAGATGCAGATAGTAAAATTGTTCAACTTAGTGAAATTAGTATGG  
ACAATTCACCTAATTTAGCATGGCCTCTTATTGTAACAGCTTTAAGGGCCAATTC  
TGCTGTCAAATTACAGAATAATGAGCTTAGTCCTGTTGCACTACGACAGATGTCT  
TGTGCTGCCGGTACTACACAAACTGCTTGCACTGATGACAATGCGTTAGCTTACT  
ACAACACAACAAAGGGAGGTAGGTTTGTACTTGCACTGTTATCCGATTTACAGG  
ATTTGAAATGGGCTAGATTCCTAAGAGTGATGGAACCTGGTACTATCTATACAGA  
ACTGGAACCACCTTGTAGGTTTGTACAGACACACCTAAAGGTCCTAAAGTGAA  
GTATTTATACTTTATTAAAGGATTAACAACCTAAATAGAGGTATGGTACTTGGT  
AGTTTAGCTGCCACAGTACGTCTACAAGCTGGTAATGCAACAGAAGTGCCTGCC  
AATTCAACTGTATTATCTTTCTGTGCTTTTGCTGTAGATGCTGCTAAAGCTTACAA  
AGATTATCTAGCTAGTGGGGGACAACCAATCACTAATTGTGTTAAGATGTTGTGT  
ACACACACTGGTACTGGTCAGGCAATAACAGTTACACCGGAAGCCAATATGGAT  
CAAGAATCCTTTGGTGGTGCATCGTGTTGTCTGTACTGCCGTTGCCACATAGATC  
ATCCAAATCCTAAAGGATTTTGTGACTTAAAAGGTAAGTATGTACAAATACCTAC  
AACTTGTGCTAATGACCCTGTGGGTTTTACACTTAAAAACACAGTCTGTACCGTC  
TGCGGTATGTGGAAAGGTTATGGCTGTAGTTGTGATCAACTCCGCGAACCCATGC  
TTCAGTCAGCTGATGCACAATCGTTTTTAAACGGGTTTGCGGTGTAAGTGCAGCC  
CGTCTTACACCGTGCGGCACAGGCACTAGTACTGATGTCGTATACAGGGCTTTTG  
ACATCTACAATGATAAAGTAGCTGGTTTTGCTAAATTCCTAAAACTAATTGTTG  
TCGCTTCCAAGAAAAGGACGAAGATGACAATTTAATTGATTCTTACTTTGTAGTT  
AAGAGACACACTTTCTCTAACTACCAACATGAAGAAACAATTTATAATTTACTTA  
AGGATTGTCCAGCTGTTGCTAAACATGACTTCTTTAAGTTTAGAATAGACGGTGA  
CATGGTACCACATATATCACGTCAACGTCTTACTAAATACACAATGGCAGACCTC  
GTCTATGCTTTAAGGCATTTTGTGATGAAGGTAATTGTGACACATTAAGAAATAC



TTGTCACATACAATTGTTGTGATGATGATTATTTCAATAAAAAGGACTGGTATGA  
TTTTGTAGAAAACCCAGATATATTACGCGTATACGCCAACTTAGGTGAACGTGTA  
CGCCAAGCTTTGTTAAAAACAGTACAATTCTGTGATGCCATGCGAAATGCTGGTA  
TTGTTGGTGTACTGACATTAGATAATCAAGATCTCAATGGTAACTGGTATGATTT  
CGGTGATTTTCATACAAACCACGCCAGGTAGTGGAGTTCCTGTTGTAGATTCTTAT  
TATTCATTGTTAATGCCTATATTAACCTTGACCAGGGCTTTAACTGCAGAGTCAC  
ATGTTGACACTGACTTAACAAAGCCTTACATTAAGTGGGATTTGTAAAATATGA  
CTTCACGGAAGAGAGGTTAAAACCTTTTGACCGTTATTTTAAATATTGGGATCAG  
ACATAACCACCAAATTGTGTTAACTGTTTGGATGACAGATGCATTCTGCATTGTG  
CAAACCTTTAATGTTTTATTCTCTACAGTGTCCACCTACAAGTTTTGGACCACTA  
GTGAGAAAAATATTTGTTGATGGTGTCCATTTGTAGTTTCAACTGGATAACCACT  
TCAGAGAGCTAGGTGTTGTACATAATCAGGATGTAACTTACATAGCTCTAGACT  
TAGTTTTAAGGAATTACTTGTGTATGCTGCTGACCCTGCTATGCACGCTGCTTCTG  
GTAATCTATTACTAGATAAACGCACTACGTGCTTTTCAGTAGCTGCACTTACTAA  
CAATGTTGCTTTTCAAACCTGTCAAACCCGGTAATTTTAAACAAAGACTTCTATGAC  
TTTGCTGTGTCTAAGGGTTTCTTTAAGGAAGGAAGTTCTGTTGAATTA AACACT  
TCTTCTTTGCTCAGGATGGTAATGCTGCTATCAGCGATTATGACTACTATCGTTAT  
AATCTACCAACAATGTGTGATATCAGACA ACTACTATTTGTAGTTGAAGTTGTTG  
ATAAGTACTTTGATTGTTACGATGGTGGCTGTATTAATGCTAACCAAGTCATCGT  
CAACAACCTAGACAAATCAGCTGGTTTTCCATTTAATAAATGGGGTAAGGCTAG  
ACTTTATTATGATTCAATGAGTTATGAGGATCAAGATGCACTTTTCGCATATACA  
AAACGTAATGTCATCCCTACTATAACTCAAATGAATCTTAAGTATGCCATTAGTG  
CAAAGAATAGAGCTCGCACCGTAGCTGGTGTCTCTATCTGTAGTACTATGACCAA  
TAGACAGTTTCATCAAAAATTATTGAAATCAATAGCCGCCACTAGAGGAGCTACT  
GTAGTAATTGGAACAAGCAAATTCTATGGTGGTTGGCACAACATGTTAAAAACT  
GTTTATAGTGATGTAGAAAACCCTCACCTTATGGGTTGGGATTATCCTAAATGTG  
ATAGAGCCATGCCTAACATGCTTAGAATTATGGCCTCACTTGTCTTGCTCGCAA  
ACATAACCGTGTTGTAGCTTGTACACCGTTTCTATAGATTAGCTAATGAGTGT  
GCTCAAGTATTGAGTGAAATGGTCATGTGTGGCGGTTCACTATATGTTAAACCAG  
GTGGAACCTCATCAGGAGATGCCACA ACTGCTTATGCTAATAGTGTTTTTAACAT  
TTGTCAAGCTGTCACGGCCAATGTTAATGCACTTTTATCTACTGATGGTAAACAAA  
ATTGCCGATAAGTATGTCCGCAATTTACAACACAGACTTTATGAGTGTCTCTATA  
GAAATAGAGATGTTGACACAGACTTTGTGAATGAGTTTTACGCATATTTGCGTAA  
ACATTTCTCAATGATGATACTCTCTGACGATGCTGTTGTGTGTTTCAATAGCACTT

ATGCATCTCAAGGTCTAGTGGCTAGCATAAAGAACTTTAAGTCAGTTCTTTATTA  
TCAAACAATGTTTTTATGTCTGAAGCAAATGTTGGACTGAGACTGACCTTACT  
AAAGGACCTCATGAATTTTGCTCTCAACATACAATGCTAGTTAAACAGGGTGATG  
ATTATGTGTACCTTCCTTACCCAGATCCATCAAGAATCCTAGGGGCCGGCTGTTT  
TGTAGATGATATCGTAAAAACAGATGGTACACTTATGATTGAACGGTTCGTGTCT  
TTAGCTATAGATGCTTACCCACTTACTAAACATCCTAATCAGGAGTATGCTGATG  
TCTTTCATTTGTACTIONTACAATACATAAGAAAGCTACATGATGAGTTAACAGGACA  
CATGTTAGACATGTATTCTGTTATGCTTACTAATGATAAACACTTCAAGGTATTGG  
GAACCTGAGTTTTATGAGGCTATGTACACACCCGCATACAGTCTTACAGGCTGTTG  
GGGCTTGTGTTCTTTGCAATTCACAGACTTCATTAAGATGTGGTGCTTGCATACGT  
AGACCATTCTTATGTTGTAAATGCTGTTACGACCATGTCATATCAACATCACATA  
AATTAGTCTTGTCTGTTAATCCGTATGTTTGCAATGCTCCAGGTTGTGATGTCACA  
GATGTGACTCAACTTTACTTAGGAGGTATGAGCTATTATTGTAAATCACATAAAC  
CACCCATTAGTTTTCCATTGTGTGCTAATGGACAAGTTTTTGGTTTATATAAAAAT  
ACATGTGTTGGTAGCGATAATGTTACTGACTTTAATGCAATTGCAACATGTGACT  
GGACAAATGCTGGTGATTACATTTTAGCTAACACCTGTACTGAAAGACTCAAGCT  
TTTTGCAGCAGAAACGCTCAAAGCTACTGAGGAGACATTTAAACTGTCTTATGGT  
ATTGCTACTGTACGTGAAGTGCTGTCTGACAGAGAATTACATCTTTCATGGGAAG  
TTGGTAAACCTAGACCACCACTTAACCGAAATTATGTCTTTACTGGTTATCGTGT  
AACTAAAAACAGTAAAGTACAAATAGGAGAGTACACCTTTGAAAAAGGTGACTA  
TGGTGATGCTGTTGTTTACCGAGGTACAACAACCTTACAAATTAATGTTGGTGAT  
TATTTTGTGCTGACATCACATACAGTAATGCCATTAAGTGCACCTACACTAGTGC  
CACAAGAGCACTATGTTAGAATTACTGGCTTATACCCAACACTCAATATCTCAGA  
TGAGTTTTCTAGCAATGTTGCAAATTATCAAAAGGTTGGTATGCAAAAGTATTCT  
ACACTCCAGGGACCACCTGGTACTGGTAAGAGTCATTTTGCTATTGGCCTAGCTC  
TCTACTACCCTTCTGCTCGCATAGTGTATACAGCTTGCTCTCATGCCGCTGTTGAT  
GCACTATGTGAGAAGGCATTAATAATTTGCCTATAGATAAATGTAGTAGAATTA  
TACCTGCACGTGCTCGTGTAGAGTGTTTTGATAAATTCAAAGTGAATTCAACATT  
AGAACAGTATGTCTTTTGTACTGTAAATGCATTGCCTGAGACGACAGCAGATATA  
GTTGTCTTTGATGAAATTTCAATGGCCACAAATTATGATTTGAGTGTTGTCAATG  
CCAGATTACGTGCTAAGCACTATGTGTACATTGGCGACCCTGCTCAATTACCTGC  
ACCACGCACATTGCTAACTAAGGGCACACTAGAACCAGAATATTTCAATTCAGT  
GTGTAGACTTATGAAAATATAGGTCCAGACATGTTCCCTCGGAACTTGTCGGCGT  
TGTCTGCTGAAATTGTTGACACTGTGAGTGCTTTGGTTTATGATAATAAGCTTA

AAGCACATAAAGACAAATCAGCTCAATGCTTTAAAATGTTTTATAAGGGTGTTAT  
CACGCATGATGTTTCATCTGCAATTAACAGGCCACAAATAGGCGTGGTAAGAGA  
ATTCCTTACACGTAACCCTGCTTGGAGAAAAGCTGTCTTTATTTACCTTATAATT  
CACAGAATGCTGTAGCCTCAAAGATTTTGGGACTACCAACTCAAACCTGTTGATTC  
ATCACAGGGCTCAGAATATGACTATGTCATATTCACTCAAACCACTGAAACAGCT  
CACTCTTGTAATGTAAACAGATTTAATGTTGCTATTACCAGAGCAAAAAGTAGGCA  
TACTTTGCATAATGTCTGATAGAGACCTTTATGACAAGTTGCAATTTACAAGTCT  
TGAAATTCACGTAGGAATGTGGCAACTTTACAAGCTGAAAATGTAAACAGGACT  
CTTTAAAGATTGTAGTAAGGTAATCACTGGGTTACATCCTACACAGGCACCTACA  
CACCTCAGTGTTGACACTAAATTCAAAACCTGAAGGTTTATGTGTTGACATACCTG  
GCATACCTAAGGACATGACCTATAGAAGACTCATCTCTATGATGGGTTTTAAAAT  
GAATTATCAAGTTAATGGTTACCCTAACATGTTTATCACCCGCGAAGAAGCTATA  
AGACATGTACGTGCATGGATTGGCTTCGATGTCGAGGGGTGTCATGCTACTAGAG  
AAGCTGTTGGTACCAATTTACCTTTACAGCTAGGTTTTTCTACAGGTGTTAACCTA  
GTTGCTGTACCTACAGGTTATGTTGATACACCTAATAATACAGATTTTTCCAGAG  
TTAGTGCTAAACCACCGCCTGGAGATCAATTTAAACACCTCATAACCACTTATGTA  
CAAAGGACTTCCTTGGAATGTAGTGCGTATAAAGATTGTACAAATGTTAAGTGAC  
ACACTTAAAATCTCTCTGACAGAGTCGTATTTGTCTTATGGGCACATGGCTTTG  
AGTTGACATCTATGAAGTATTTTGTGAAAATAGGACCTGAGCGCACCTGTTGTCT  
ATGTGATAGACGTGCCACATGCTTTTCCACTGCTTCAGACACTTATGCCTGTTGG  
CATCATTCTATTGGATTTGATTACGTCTATAATCCGTTTATGATTGATGTTCAACA  
ATGGGGTTTTACAGGTAACCTACAAAGCAACCATGATCTGTATTGTCAAGTCCAT  
GGTAATGCACATGTAGCTAGTTGTGATGCAATCATGACTAGGTGTCTAGCTGTCC  
ACGAGTGCTTTGTTAAGCGTGTTGACTGGACTATTGAATATCCTATAATTGGTGA  
TGAAGTGAAGATTAATGCGGCTTGTAGAAAGGTTCAACACATGGTTGTTAAAGCT  
GCATTATTAGCAGACAAATCCCAGTTCTTCACGACATTGGTAACCCTAAAGCTA  
TTAAGTGTGTACCTCAAGCTGATGTAGAATGGAAGTTCTATGATGCACAGCCTTG  
TAGTGACAAAGCTTATAAAATAGAAGAATTATTCTATTCTTATGCCACACATTCT  
GACAAATTCACAGATGGTGTATGCCTATTTTGGAAATTGCAATGTCGATAGATATC  
CTGCTAATTCCATTGTTTGTAGATTTGACACTAGAGTGCTATCTAACCTTAACTTG  
CCTGGTTGTGATGGTGGCAGTTTGTATGTAAATAAACATGCATTCCACACACCAG  
CTTTTGATAAAAGTGCTTTTGTTAATTTAAAACAATTACCATTTTTCTATTACTCT  
GACAGTCCATGTGAGTCTCATGGAAAACAAGTAGTGTCAGATATAGATTATGTA  
CCACTAAAGTCTGCTACGTGTATAACACGTTGCAATTTAGGTGGTGCTGTCTGTA

GACATCATGCTAATGAGTACAGATTGTATCTCGATGCTTATAACATGATGATCTC  
AGCTGGCTTTAGCTTGTGGGTTTACAAACAATTTGATACTTATAACCTCTGGAAC  
ACTTTTACAAGACTTCAGAGTTTAGAAAATGTGGCTTTTAATGTTGTAAATAAGG  
GACACTTTGATGGACAACAGGGTGAAGTACCAGTTTCTATCATTAAATAACACTGT  
TTACACAAAAGTTGATGGTGTGATGTAGAATTGTTTGAAAATAAAAACAACATTA  
CCTGTTAATGTAGCATTGAGCTTTGGGCTAAGCGCAACATTAACCAGTACCAG  
AGGTGAAAATACTCAATAATTTGGGTGTGGACATTGCTGCTAATACTGTGATCTG  
GGACTACAAAAGAGATGCTCCAGCACATATCTACTATTGGTGTGTTTGTCTATG  
ACTGACATAGCCAAGAAACCAACTGAAACGATTTGTGCACCACTCACTGTCTTTT  
TTGATGGTAGAGTTGATGGTCAAGTAGACTTATTTAGAAATGCCCGTAATGGTGT  
TCTTATTACAGAAGGTAGTGTTAAAGGTTTACAACCATCTGTAGGTCCCAAACAA  
GCTAGTCTTAATGGAGTCACATTAATTGGAGAAGCCGTAAAAACACAGTTCAATT  
ATTATAAGAAAGTTGATGGTGTGTTGCCAACAATTACCTGAAACTTACTTTACTCA  
GAGTAGAAATTTACAAGAATTTAAACCCAGGAGTCAAATGGAAATTGATTTCTT  
AGAATTAGCTATGGATGAATTCATTGAACGGTATAAATTAGAAGGCTATGCCTTC  
GAACATATCGTTTATGGAGATTTTAGTCATAGTCAGTTAGGTGGTTTACATCTAC  
TGATTGGACTAGCTAAACGTTTTAAGGAATCACCTTTTGAATTAGAAGATTTTAT  
TCCTATGGACAGTACAGTTAAAACTATTTCATAACAGATGCGCAAACAGGTTCA  
TCTAAGTGTGTGTTCTGTTATTGATTTATTACTTGATGATTTTGTGAAATAAT  
AAAATCCCAAGATTTATCTGTAGTTTCTAAGGTTGTCAAAGTGACTATTGACTAT  
ACAGAAATTTCAATTTATGCTTTGGTGTAAAGATGGCCATGTAGAAACATTTTACC  
CAAATTACAATCTAGTCAAGCGTGGCAACCGGGTGTGCTATGCCTAATCTTTA  
CAAATGCAAAGAATGCTATTAGAAAAGTGTGACCTTCAAATTATGGTGATAG  
TGCAACATTACCTAAAGGCATAATGATGAATGTCGCAAATATACTCAACTGTGT  
CAATATTTAAACACATTAACATTAGCTGTACCCTATAATATGAGAGTTATACATT  
TTGGTGCTGGTTCTGATAAAGGAGTTGCACCAGGTACAGCTGTTTTAAGACAGTG  
GTTGCCTACGGGTACGCTGCTTGTGCGATTCAGATCTTAATGACTTTGTCTCTGATG  
CAGATTCAACTTTGATTGGTGATTGTGCAACTGTACATACAGCTAATAAATGGGA  
TCTCATTATTAGTGATATGTACGACCCTAAGACTAAAAATGTTACAAAAGAAAAT  
GACTCTAAAGAGGGTTTTTTCACTTACATTTGTGGGTTTATACAACAAAAGCTAG  
CTCTTGGAGGTTCCGTGGCTATAAAGATAACAGAACATTCTTGGAATGCTGATCT  
TTATAAGCTCATGGGACACTTCGCATGGTGGACAGCCTTTGTTACTAATGTGAAT  
GCGTCATCATCTGAAGCATTTTTAATTGGATGTAATTATCTTGGCAAACCACGCG  
AACAAATAGATGGTTATGTCATGCATGCAAATTACATATTTTGGAGGAATACAA

ATCCAATTCAGTTGTCTTCCTATTCTTTATTTGACATGAGTAAATTTCCCCTTAAA  
TTAAGGGGTACTGCTGTTATGTCTTTAAAAGAAGGTCAAATCAATGATATGATTT  
TATCTCTTCTTAGTAAAGGTAGACTTAT

>S

ATTAAAGGTTTATACCTTCCCAGGTAACAAACCAACCAACTTTCGATCTCTTGTA  
GATCTGTTCTCTAAACGAACAATGTTTGTCTTTTCTTGTTTTATTGCCACTAGTCTCT  
AGTCAGTGTGTTAATCTTACAACCAGAACTCAATTACCCCCTGCATACACTAATT  
CTTTCACACGTGGTGTATTACCCTGACAAAGTTTTTCAGATCCTCAGTTTTACAT  
TCAACTCAGGACTTGTTCTTACCTTTCTTTTCCAATGTTACTTGGTTCCATGCTAT  
ACATGTCTCTGGGACCAATGGTACTAAGAGGTTTGATAACCCTGTCCTACCATTT  
AATGATGGTGTATTATTTTGCTTCCACTGAG

>ORF3a

ATTAAAGGTTTATACCTTCCCAGGTAACAAACCAACCAACTTTCGATCTCTTGTA  
GATCTGTTCTCTAAACGAACCTTATGGATTTGTTTATGAGAATCTTCACAATTGGA  
ACTGTAACCTTGAAGCAAGGTGAAATCAAGGATGCTACTCCTTCAGATTTTGTTTC  
GCGCTACTGCAACGATACCGATAACAAGCCTCACTCCCTTTCGGATGGCTTATTGT  
TGGCGTTGCACTTCTTGCTGTTTTTCAGAGCGCTTCCAAAATCATAACCCTCAA  
AAGAGATGGC

>E

ATTAAAGGTTTATACCTTCCCAGGTAACAAACCAACCAACTTTCGATCTCTTGTA  
GATCTGTTCTCTAAACGAACCTTATGTACTCATTCGTTTCGGAAGAGACAGGTACG  
TTAATAGTTAATAGCGTACTTCTTTTTCTTGCTTTCGTGGTATTCTTGCTAGTTACA  
CTAGCCATCCTTACTGCGCTTCGATTGTGTGCGTACTGCTGCAATATTGTTAACGT  
GAGTCTTGTA

>M

ATTAAAGGTTTATACCTTCCCAGGTAACAAACCAACCAACTTTCGATCTCTTGTA  
GATCTGTTCTCTAAACGAACCTAAATATTATATTAGTTTTTCTGTTTGGAACCTTAA  
TTTTAGCCATGGCAGATTCCAACGGTACTATTACCGTTGAAGAGCTTAAAAAGCT  
CCTTGAACAATGGAACCTAGTAATAGGTTTCCTATTCTTACATGGATTTGTCTTC  
TACAATTTGCCTATGCCAACAGGAA

>ORF6

ATTAAAGGTTTATACCTTCCCAGGTAACAAACCAACCAACTTTCGATCTCTTGTA  
GATCTGTTCTCTAAACGAACGCTTTCTTATTACAAATTGGGAGCTTCGCAGCGTG  
TAGCAGGTGACTCAGGTTTTGCTGCATACAGTCGCTACAGGATTGGCAACTATAA  
ATTAAACACAGACCATTCCAGTAGCAGTGACAATATTGCTTTGCTTGTACAGTAA  
GTGACAACAGATGTTTCATCTCGTTGACTTTCAGGTTACTATAGCAGAGATATTA  
CTAA

>ORF7a

ATTAAAGGTTTATACCTTCCCAGGTAACAAACCAACCAACTTTCGATCTCTTGTA  
GATCTGTTCTCTAAACGAACATGAAAATTATTCTTTTCTTGGCACTGATAACACTC  
GCTACTTGTGAGCTTTATCACTACCAAGAGTGTGTTAGAGGTACAACAGTACTTT  
TAAAAGAACCTTGCTCTTCTGGAACATACGAGGGCAATTCACCATTTTCATCCTCT  
AGCTGATAACAAATTTGCACTGACTTGCTTTAGCACTCAATTTGCTTTTGCTTGTC  
CTGACGGCGTAAAACACGTCTATCAGTTACGTGCCAGATCAGTTTCACCTAAACT

>ORF7b

ATTAAAGGTTTATACCTTCCCAGGTAACAAACCAACCAACTTTCGATCTCTTGTA  
GATCTGTTCTCTAAACTGTTTCATCAGACAAGAGGAAGTTCAAGAACTTTACTCTC  
CAATTTTTCTTATTGTTGCGGCAATAGTGTTTATAACACTTTGCTTCACACTCAA  
AGAAAGACAGAATGATTGAACTTTCATTAATTGACTTCTATTTGTGCTTTTTAGCC  
TTTCTGCTATTCCTTGTTTTAATTATGCTTATTATCTTTTGGTTCTCACTTGAACT

>ORF8

ATTAAAGGTTTATACCTTCCCAGGTAACAAACCAACCAACTTTCGATCTCTTGTA  
GATCTGTTCTCTAAACGAACATGAAATTTCTTGTTTTCTTAGGAATCATCACA  
GTAGCTGCATTCACCAAGAATGTAGTTTACAGTCATGTA  
CTCAACATCAACCAT  
ATGTAGTTGATGACCCGTGTCCTATTCACTTCTATTCTAAATGGTATATTAGAGTA  
GGAGCTAGAAAATCAGCACCTTTAATTGAATTGTGCGTGGATGAGGCTGGTTCTA  
AATCACCCATTCAGTACATCGATAT

>N

ATTAAAGGTTTATACCTTCCCAGGTAACAAACCAACCAACTTTCGATCTCTTGTA  
GATCTGTTCTCTAAACGAACAACTAAAATGTCTGATAATGGACCCCAAATCA

GCGAAATGCACCCCGCATTACGTTTGGTGGACCCTCAGATTCAACTGGCAGTAAC  
 CAGAATGGAGAACGCAGTGGGGCGCGATCAAACAACGTCGGCCCCAAGGTTTA  
 CCCAATAATACTGCGTCTTGGTTCACCGCTCTCACTCAACATGGCAAGGAAGACC  
 TTAAATTCCTCGAGGACAAGGCGTTCCAATTAACAC

>ORF10-15

ATTAAAGGTTTATACCTTCCCAGGTAACAAACCAACCAACTTTCGATCTCTTGTA  
 GATCTGTTCTCTAAACTCATGCAGACCACACAAGGCAGATGGGCTATATAAACGT  
 TTTTCGCTTTTCCGTTTACGATATATAGTCTACTCTTGTGCAGAATGAATTCTCGTA  
 ACTACATAGCACAAGTAGATGTAGTTAACTTTAATCTCACATAGCAATCTTTAAT  
 CAGTGTGTAACATTAGGGAGGACTTGAAAGAGCCACCACATTTTCACCGAGGCC  
 ACGCGGAGTACGATCGAGTGTACAGTGAACAATGCTAGGGAGAGCTGCCTATAT  
 GGAAGAGCCCTAATGTGTAAAATTAAT

Supplementary Table S1. Table showing the position of the forward primer in each of the two Ampliseq pools as well as the predicted amplicon length from virus genome RNA and the individual subgenomic RNAs. Short subgenomic amplicons are indicated in bold type.

| Forward primer | Forward primer 3'-end | Virus genome RNA | S Orf2     | Orf3a      | E Orf4    | M Orf5    | Orf6      | Orf7a     | Orf7b     | Orf8      | N Orf9     | Orf10     |
|----------------|-----------------------|------------------|------------|------------|-----------|-----------|-----------|-----------|-----------|-----------|------------|-----------|
| Pool 1         | 41                    | 190              | 265        | <b>120</b> | 143       | 170       | <b>83</b> | 237       | 239       | 224       | <b>105</b> | 226       |
| Pool 2         | 51                    | 227              | <b>127</b> | 198        | <b>88</b> | <b>85</b> | 161       | <b>85</b> | <b>75</b> | <b>49</b> | 221        | <b>17</b> |

Supplementary Table S2: The number of reads with partial leader sequence in each sample mapped to the 5' UTR, known subgenomic RNAs in SARS-CoV-2 and unknown/unrecognised TRS sequences.

| Mapping Location   | Sample |     |    |    |       |       |       |       |       |     |       |        |        |    |        |
|--------------------|--------|-----|----|----|-------|-------|-------|-------|-------|-----|-------|--------|--------|----|--------|
|                    | 33     | 34  | 35 | 36 | 37    | 38    | 60    | 61    | 62    | 63  | 64    | 65     | 66     | 67 | 68     |
| <b>Unknown TRS</b> | 68     | 439 | 25 | 1  | 2138  | 409   | 408   | 1     | 1     | 0   | 10859 | 25675  | 4836   | 1  | 6345   |
| <b>5' UTR</b>      | 455    | 854 | 75 | 0  | 14857 | 11889 | 7155  | 575   | 310   | 57  | 3680  | 29936  | 136473 | 0  | 8934   |
| <b>S Gene</b>      | 15     | 5   | 1  | 0  | 362   | 158   | 268   | 0     | 0     | 0   | 0     | 11     | 1915   | 0  | 15     |
| <b>ORF 3a</b>      | 44     | 21  | 12 | 3  | 4431  | 1707  | 73    | 1     | 0     | 0   | 0     | 9      | 12813  | 0  | 13     |
| <b>E Gene</b>      | 35     | 52  | 13 | 0  | 3374  | 962   | 31556 | 10205 | 0     | 75  | 0     | 10882  | 13078  | 0  | 20126  |
| <b>M Gene</b>      | 89     | 44  | 10 | 0  | 5085  | 1589  | 424   | 292   | 90    | 2   | 85    | 1174   | 5852   | 0  | 3975   |
| <b>ORF6</b>        | 40     | 36  | 11 | 1  | 4047  | 988   | 7576  | 1     | 0     | 564 | 0     | 9756   | 4397   | 0  | 2777   |
| <b>ORF 7a</b>      | 222    | 508 | 55 | 1  | 11493 | 3843  | 8801  | 4766  | 19112 | 0   | 8725  | 150151 | 18731  | 0  | 152619 |
| <b>ORF 7b</b>      | 0      | 0   | 0  | 0  | 37    | 7     | 0     | 0     | 0     | 0   | 0     | 0      | 73     | 0  | 0      |
| <b>ORF 8</b>       | 149    | 850 | 58 | 1  | 2155  | 527   | 2764  | 0     | 0     | 0   | 2431  | 27303  | 1238   | 0  | 9242   |
| <b>N Gene</b>      | 148    | 23  | 56 | 1  | 20117 | 3215  | 4282  | 9694  | 11353 | 0   | 3092  | 1226   | 14155  | 0  | 587    |
| <b>ORF10</b>       | 0      | 0   | 0  | 0  | 0     | 0     | 0     | 0     | 0     | 0   | 0     | 0      | 16     | 0  | 0      |



Supplementary Table S3: Reads containing the partial leader sequence were searched for in the following SARS-CoV-2 Short Read Archives (SRA)'s in NCBI's SRA database.

| <b>SRA<br/>ACCESSION</b> | <b>SRA RUN</b> | <b>SEQUENCING<br/>TECHNOLOGY</b> | <b>LIBRARY<br/>AMPLIFICATION<br/>METHOD</b> | <b>SAMPLE<br/>TYPE</b> | <b>SOURCE<br/>INSTITUTION</b>                                              |
|--------------------------|----------------|----------------------------------|---------------------------------------------|------------------------|----------------------------------------------------------------------------|
| <b>ERX4123709</b>        | ERR4157962     | Illumina NextSeq<br>550          | Amplicon Arctic - v3                        | Virus Culture          | National Institute of<br>Health, USA                                       |
| <b>ERX4123706</b>        | ERR4157960     | Illumina NextSeq<br>550          | Amplicon Arctic - v3                        | Virus Culture          | National Institute of<br>Health, USA                                       |
| <b>SRX7874203</b>        | SRR11267570    | Nanopore<br>GridION              | RNA-Seq OligodT                             | Virus Culture          | University of<br>Melbourne,<br>Ausrtralia                                  |
| <b>SRX8209193</b>        | SRR11648002    | Nanopore MinION                  | Amplicon Arctic                             | Nasal Swab             | Yale School of<br>Public Health, USA                                       |
| <b>SRX8209143</b>        | SRR11648052    | Nanopore MinION                  | Amplicon Arctic - v3                        | Nasal Swab             | Yale School of<br>Public Health, USA                                       |
| <b>SRX8332763</b>        | SRR11779980    | Illumina NextSeq<br>550          | RNA Seq                                     | Virus Culture          | University of<br>Washington Virology<br>Lab, USA                           |
| <b>SRX8332745</b>        | SRR11779998    | Illumina NextSeq<br>550          | RNA Seq                                     | Virus Culture          | University of<br>Washington Virology<br>Lab, USA                           |
| <b>SRX8362096</b>        | SRR11810731    | Ion Torrent<br>Ampliseq          | Ampliseq                                    | Oropharyngeal<br>swab  | Gujarat<br>Biotechnology<br>Research Centre,<br>India                      |
| <b>SRX8362090</b>        | SRR11810737    | Ion Torrent<br>Ampliseq          | Ampliseq                                    | Oropharyngeal<br>swab  | Gujarat<br>Biotechnology<br>Research Centre,<br>India                      |
| <b>SRX8099362</b>        | SRR11528306    | Illumina MiSeq<br>MiniSeq        | Liverpool primer                            | Virus Culture          | McMaster<br>University, Canada                                             |
| <b>SRX8032205</b>        | SRR11454612    | Illumina MiSeq                   | RNA Seq                                     | Sputum                 | Hubei Provincial<br>Centre for Disease<br>Control and<br>Prevention, China |
| <b>SRX8032202</b>        | SRR11454615    | Illumina MiSeq                   | RNA Seq                                     | BAL                    | Hubei Provincial<br>Centre for Disease<br>Control and<br>Prevention, China |

|                   |             |                      |         |             |                                                                   |
|-------------------|-------------|----------------------|---------|-------------|-------------------------------------------------------------------|
| <b>SRX8032208</b> | SRR11454609 | Illumina NextSeq 550 | RNA Seq | Throat swab | Hubei Provincial Centre for Disease Control and Prevention, China |
| <b>SRX7798736</b> | SRR11178050 | MinION               | WGS     | Saliva      | University of Hong Kong, China                                    |
| <b>SRX7615553</b> | SRR10948474 | MinION               | RNA Seq | Sputum      | HKU-Shenzhen Hospital, China                                      |

Supplementary Table S4: The number of reads with partial leader sequence mapped from each SRA mapped to the 5' UTR, subgenomic RNAs and unknown/unrecognised TRS sequences.

|                     | <b>ERR415<br/>7962</b> | <b>ERR415<br/>7960</b> | <b>SRR1126<br/>7570</b> | <b>SRR1164<br/>8002</b> | <b>SRR1164<br/>8052</b> | <b>SRR1177<br/>9980</b> | <b>SRR1177<br/>9998</b> | <b>SRR1181<br/>0731</b> | <b>SRR1181<br/>0737</b> | <b>SRR1152<br/>8306</b> | <b>SRR1145<br/>4612</b> | <b>SRR1145<br/>4615</b> | <b>SRR1145<br/>4609</b> | <b>SRR1117<br/>8050</b> | <b>SRR1094<br/>8474</b> |
|---------------------|------------------------|------------------------|-------------------------|-------------------------|-------------------------|-------------------------|-------------------------|-------------------------|-------------------------|-------------------------|-------------------------|-------------------------|-------------------------|-------------------------|-------------------------|
| Platform            | Illumina               | Illumina               | Nanopore                | Nanopore                | Nanopore                | Illumina                | Illumina                | Ion<br>Torrent          | Ion<br>Torrent          | Illumina                | Illumina                | Illumina                | Illumina                | Nanopore                | Nanopore                |
| Sample              | Culture                | Culture                | Culture                 | Clinical                | Clinical                | Culture                 | Culture                 | Clinical                | Clinical                | Culture                 | Clinical                | Clinical                | Clinical                | Clinical                | Clinical                |
| Library<br>Creation | Amplicon               | Amplicon               | RNA Seq                 | Amplicon                | Amplicon                | RNA Seq                 | RNA Seq                 | Amplicon                | Amplicon                | Amplicon                | RNA Seq                 | RNA Seq                 | RNA Seq                 | Random<br>primer        | RNA Seq                 |
| Unknown<br>TRS      | 14                     | 10                     | 27                      | 2                       | 15                      | 1                       | 1                       | 1                       | 299                     | 0                       | 0                       | 0                       | 0                       | 0                       | 22                      |
| UTR                 | 0                      | 1451                   | 26                      | 2817                    | 2194                    | 59                      | 901                     | 1935                    | 4692                    | 0                       | 0                       | 6                       | 73                      | 0                       | 137                     |
| S<br>Gene           | 69                     | 82                     | 4                       | 0                       | 2                       | 2                       | 9                       | 0                       | 313                     | 0                       | 0                       | 0                       | 0                       | 0                       | 5                       |
| ORF<br>3a           | 17                     | 10                     | 32                      | 0                       | 0                       | 5                       | 29                      | 78                      | 1551                    | 0                       | 0                       | 0                       | 4                       | 0                       | 19                      |
| E<br>Gene           | 14                     | 4                      | 4                       | 7                       | 8                       | 3                       | 5                       | 328                     | 1075                    | 0                       | 0                       | 0                       | 0                       | 0                       | 1                       |
| M<br>Gene           | 56                     | 47                     | 142                     | 0                       | 0                       | 2                       | 4                       | 719                     | 1989                    | 0                       | 0                       | 0                       | 0                       | 0                       | 11                      |
| ORF<br>6            | 52                     | 89                     | 53                      | 1                       | 0                       | 1                       | 14                      | 0                       | 544                     | 0                       | 0                       | 0                       | 3                       | 0                       | 2                       |
| ORF<br>7a           | 36                     | 10                     | 171                     | 0                       | 1                       | 6                       | 21                      | 1120                    | 4138                    | 1                       | 0                       | 0                       | 0                       | 1                       | 19                      |
| ORF<br>7b           | 0                      | 0                      | 6                       | 0                       | 0                       | 0                       | 0                       | 0                       | 37                      | 0                       | 0                       | 0                       | 0                       | 0                       | 0                       |
| ORF<br>8            | 7                      | 0                      | 147                     | 0                       | 0                       | 2                       | 8                       | 0                       | 402                     | 1                       | 0                       | 0                       | 1                       | 0                       | 4                       |
| N<br>Gene           | 188                    | 285                    | 1395                    | 1                       | 18                      | 16                      | 50                      | 169                     | 4954                    | 1                       | 0                       | 2                       | 2                       | 0                       | 16                      |

|              |     |      |      |      |      |    |      |      |       |   |   |   |    |   |     |
|--------------|-----|------|------|------|------|----|------|------|-------|---|---|---|----|---|-----|
| ORF 10       | 0   | 0    | 0    | 0    | 0    | 0  | 0    | 0    | 0     | 0 | 0 | 0 | 0  | 0 | 0   |
| Total SubGen | 439 | 527  | 1954 | 9    | 29   | 37 | 140  | 2414 | 15003 | 3 | 0 | 2 | 10 | 1 | 77  |
| Total Result | 453 | 1988 | 2007 | 2828 | 2238 | 97 | 1042 | 4350 | 19994 | 3 | 0 | 8 | 83 | 1 | 236 |

Supplementary Figure S1: Average coverage per 5 million reads for samples 33 and 34.

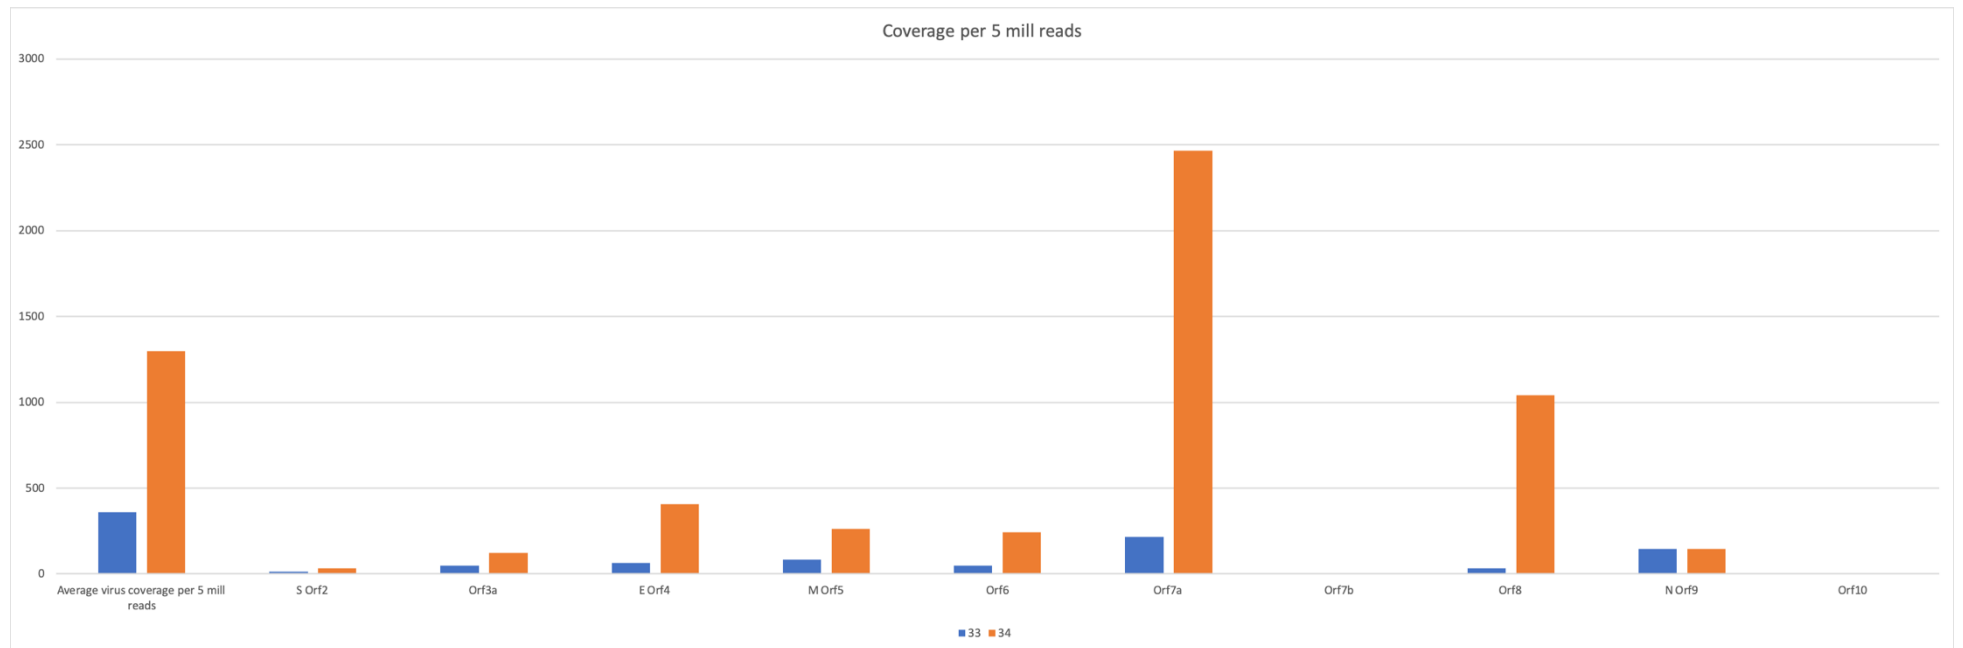

Supplementary Figure S2: Average coverage per 5 million reads for samples 37 and 38.

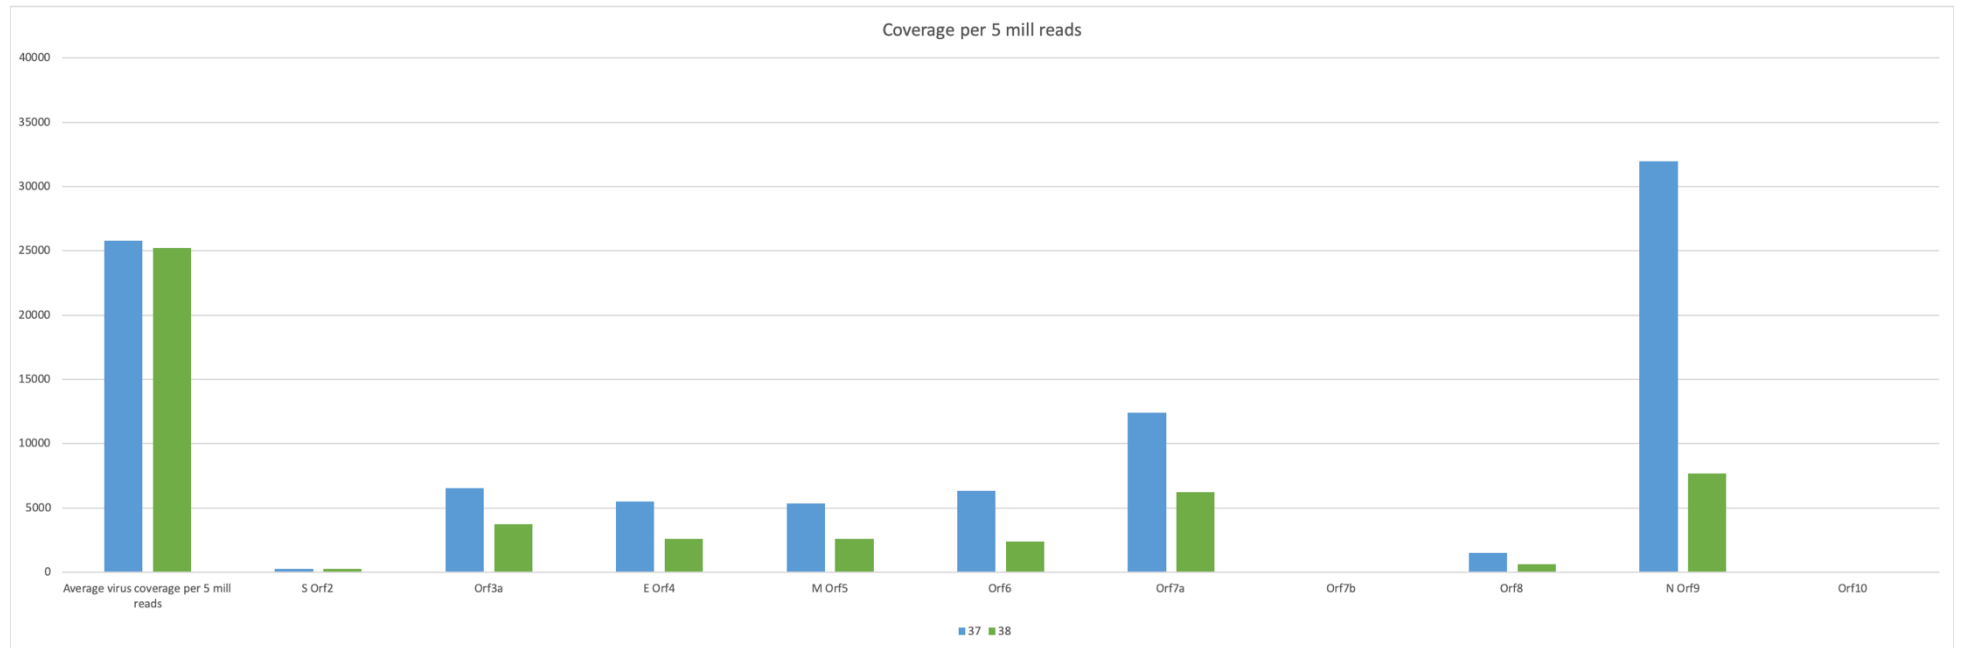

Supplementary Figure S3: Average coverage per 5 million reads for samples 37, 38, 60, 61 and 66.

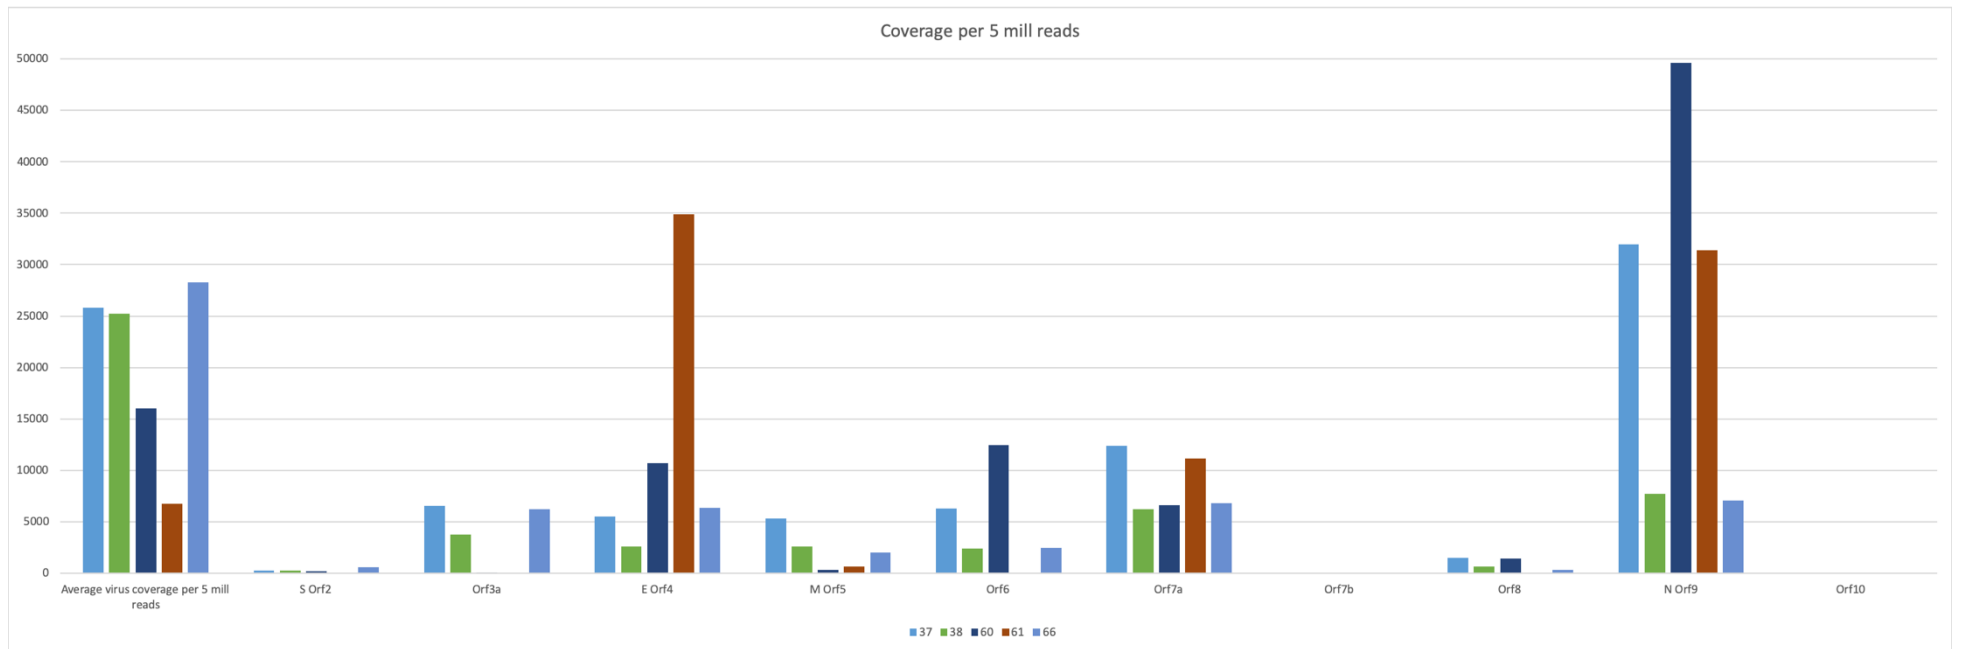

Supplementary Figure S4: Average coverage per 5 million reads for samples 65 and 68.

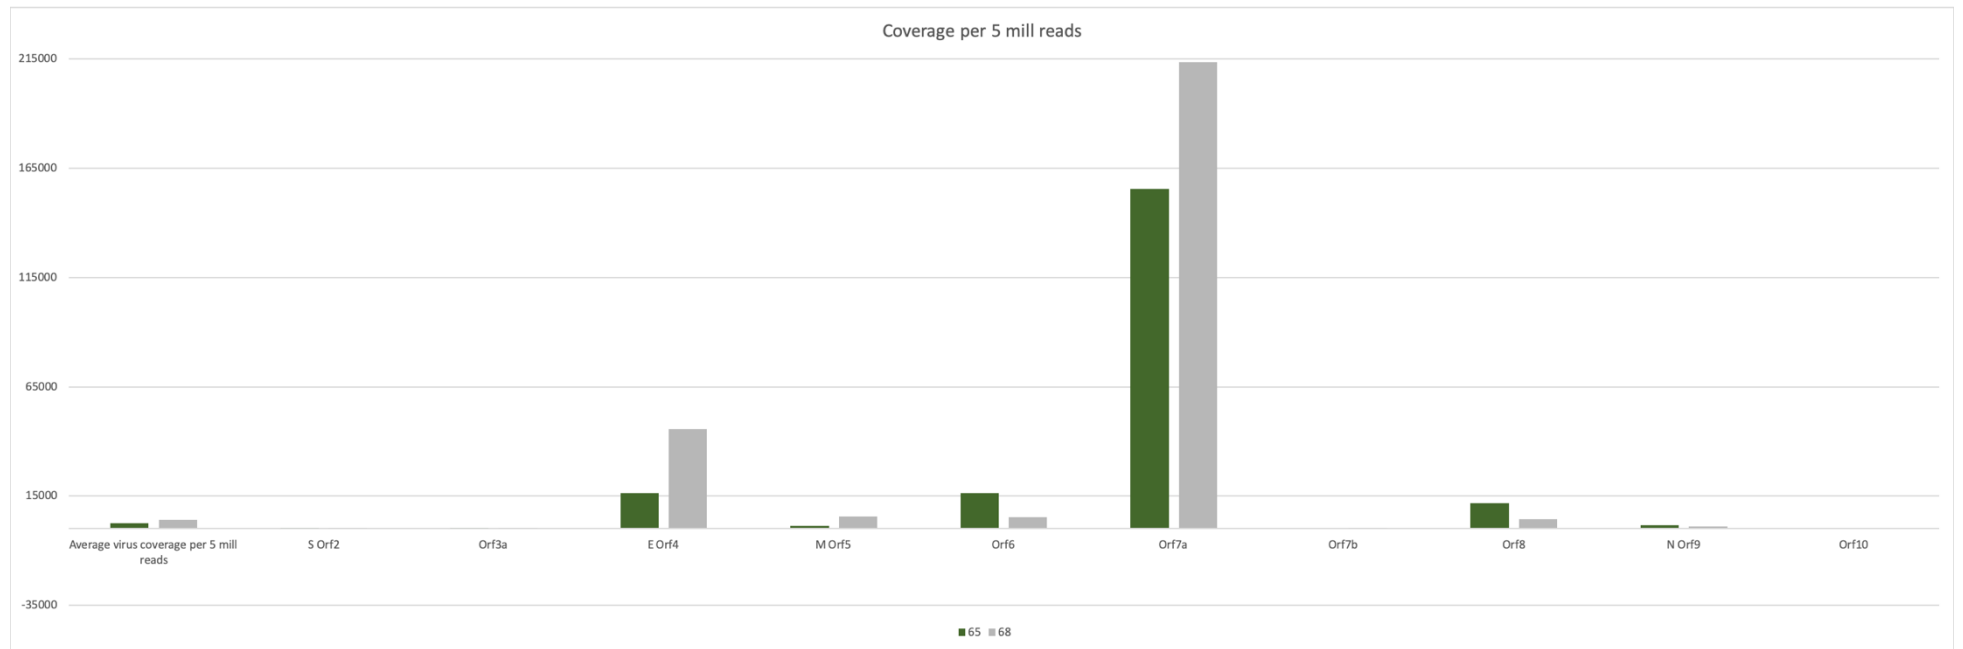

Supplementary Figure S5: Average coverage per 5 million reads for samples 37, 38, 60, 61, 62 and 63.

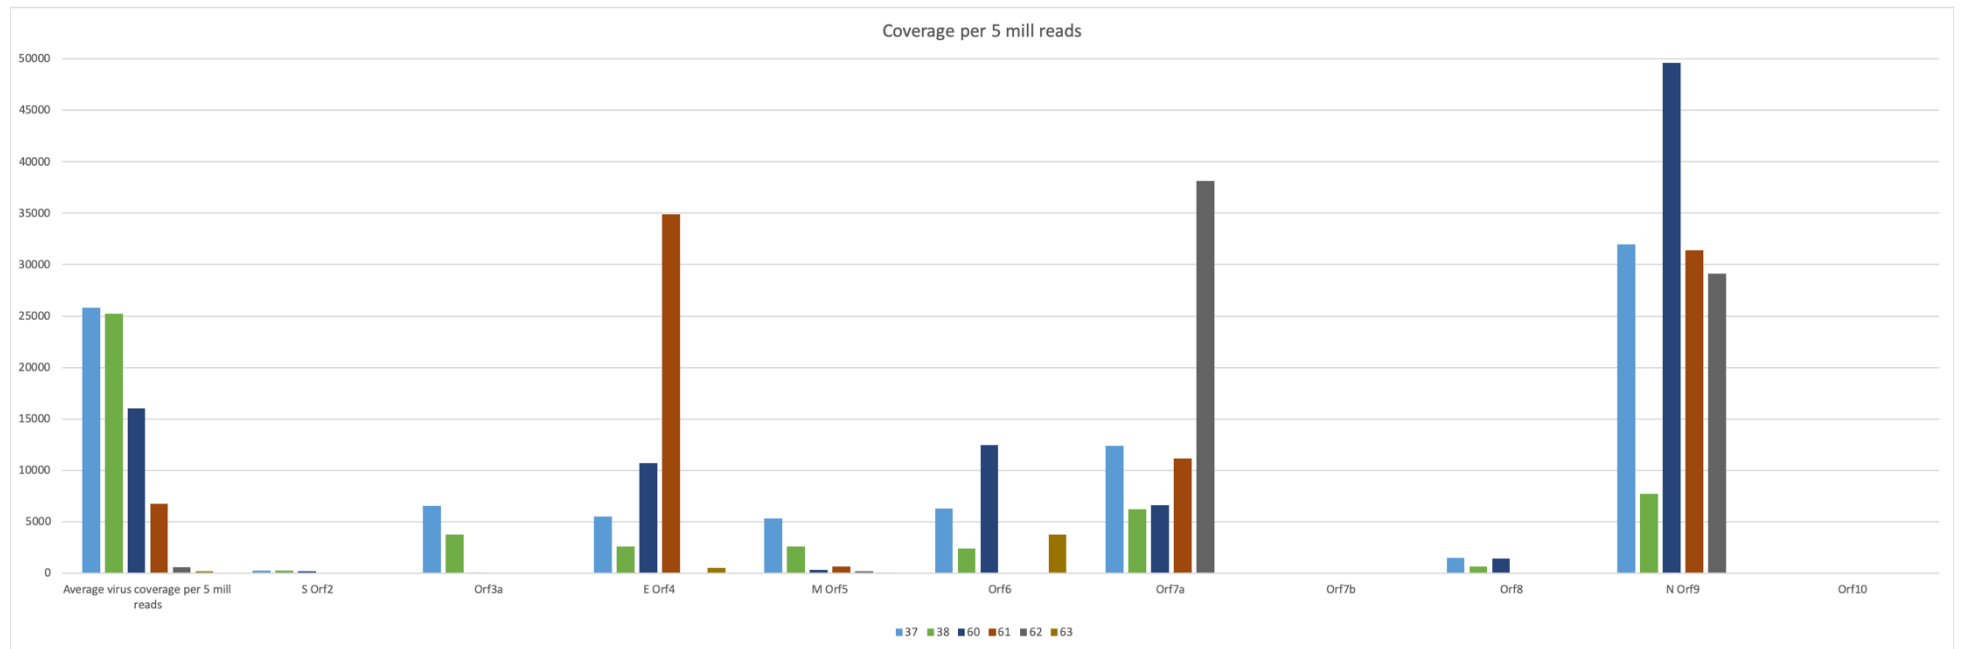

Supplementary Figure S6: The percentage of reads at MAPQ 32 with the partial leader sequence which mapped to either the 5' UTR leader sequence, the start of a known subgenomic RNA or an unknown/cryptic TRS in each sample.



Percentage of Leader Reads by ORF

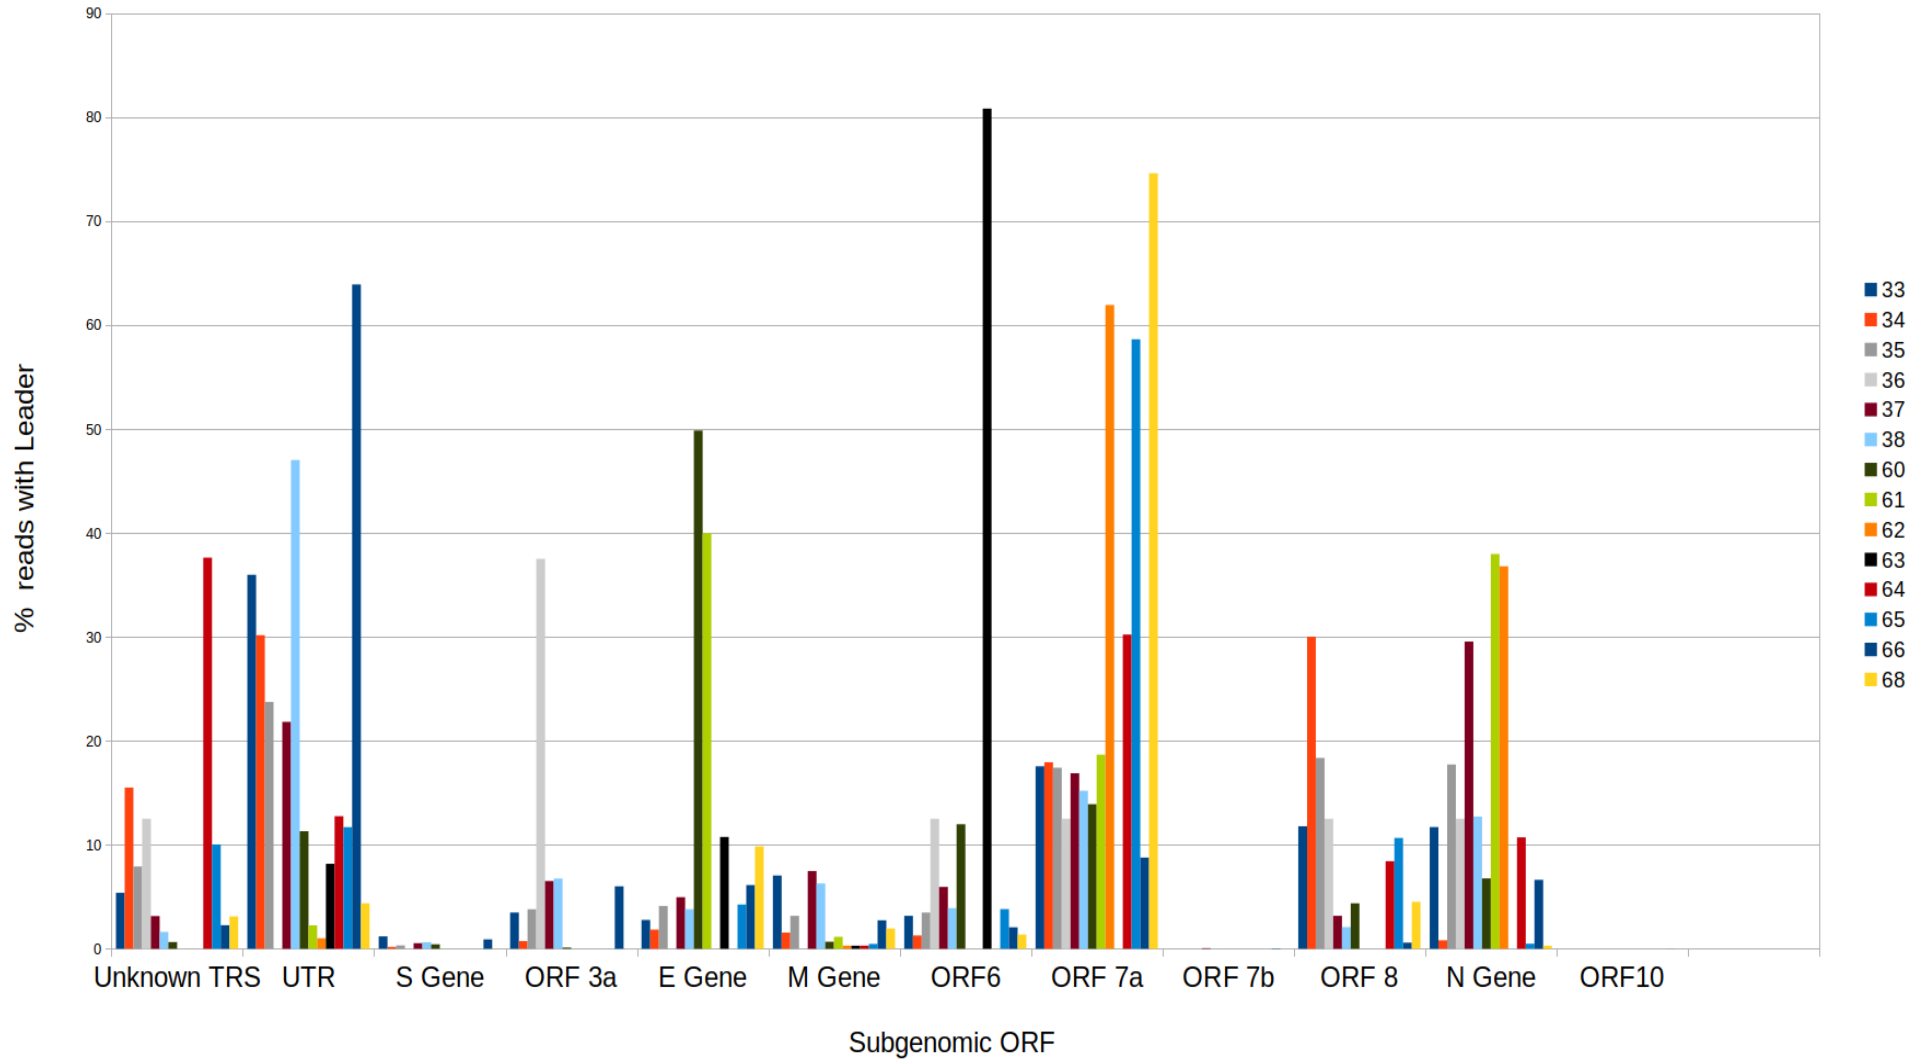

Supplementary Figure S7: The percentage of reads with a minimum alignment score of 50 and mapping percentage identity of 90% or higher within the selected SRA's containing the partial leader sequence and mapped to either the 5' UTR, the start of subgenomic RNA or an unknown site/cryptic TRS.

Percentage of Reads with leader mapped to SARS-CoV-2 SRA's

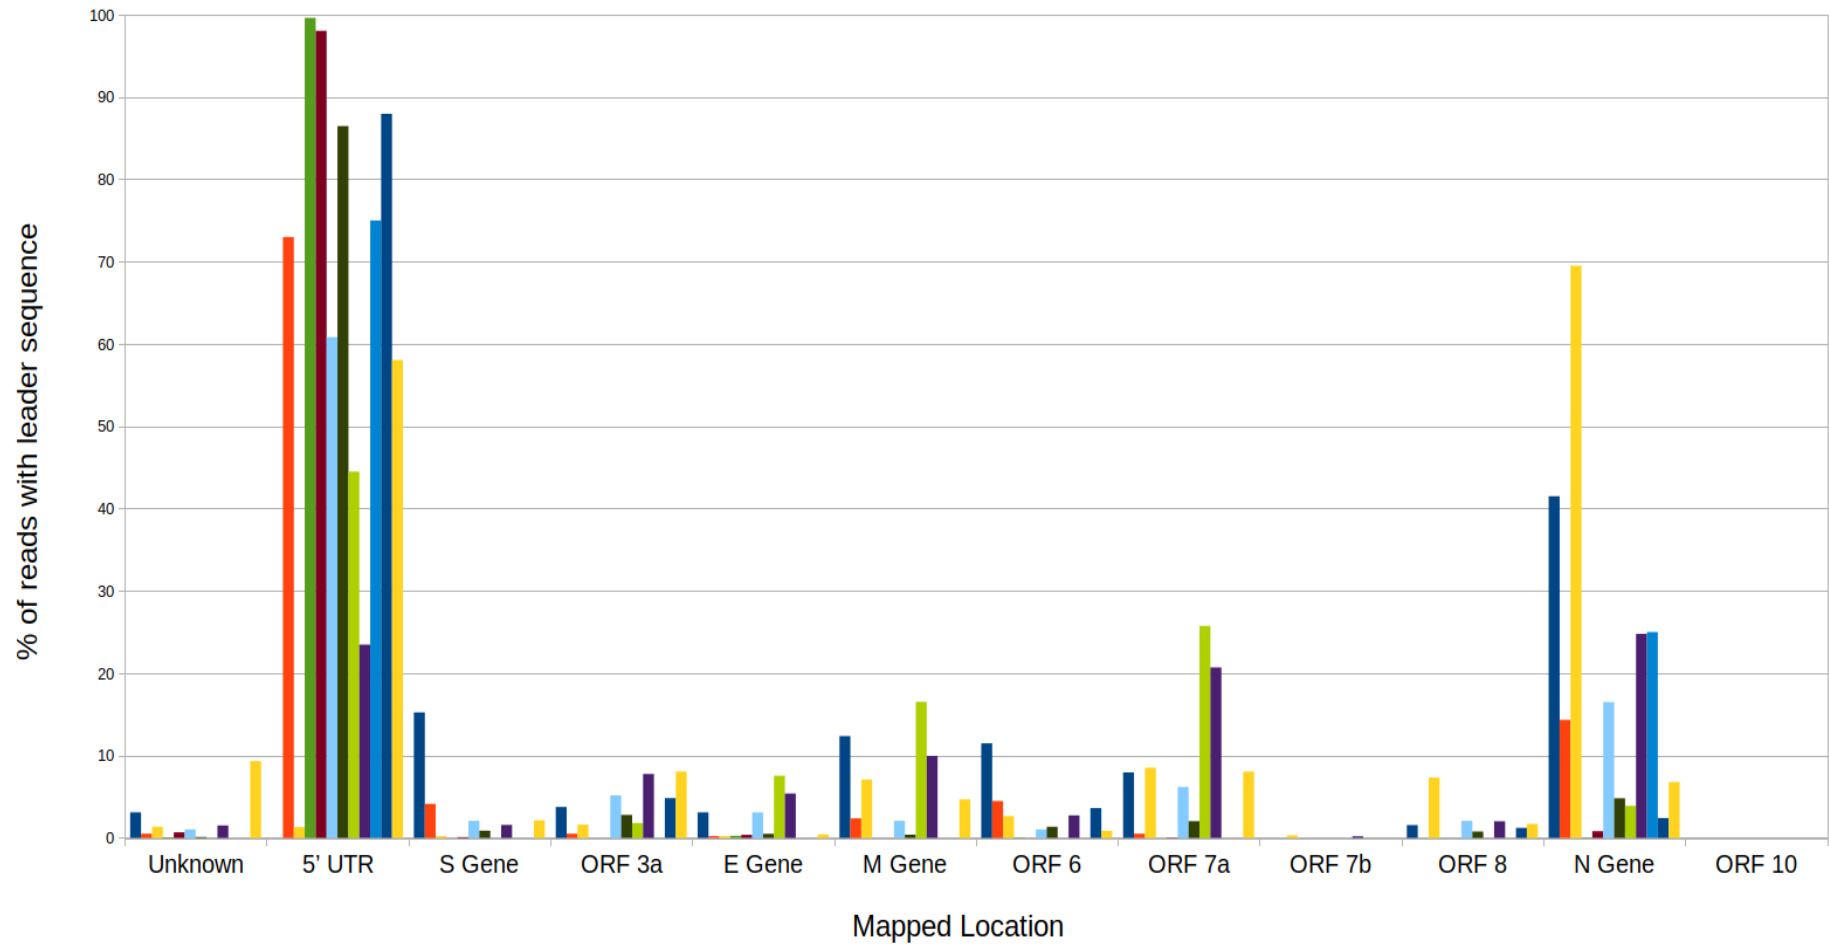

Supplement: Supplementary file [file 2020.06.01.20119750-1.pdf]
